# Supplementary material for: Rtt109 slows replication speed by histone N-terminal acetylation
Source: HighWire-hosted journal article supplement (doi:10.1101/gr.266510.120), 2021-02-09
Supplement: Supplemental_Material.docx [file Supplemental_Material.docx]

**Supplemental Material:**


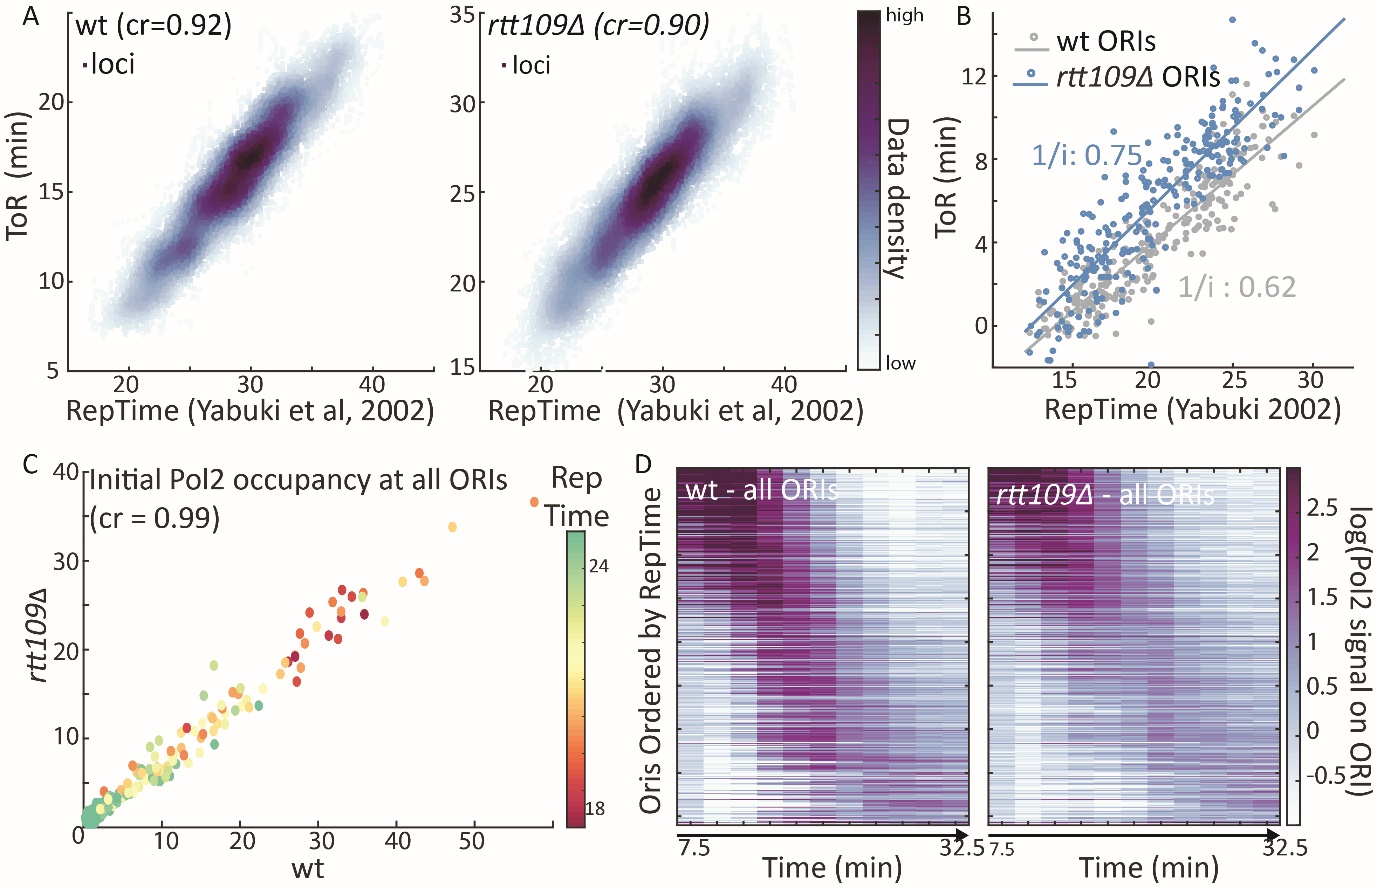


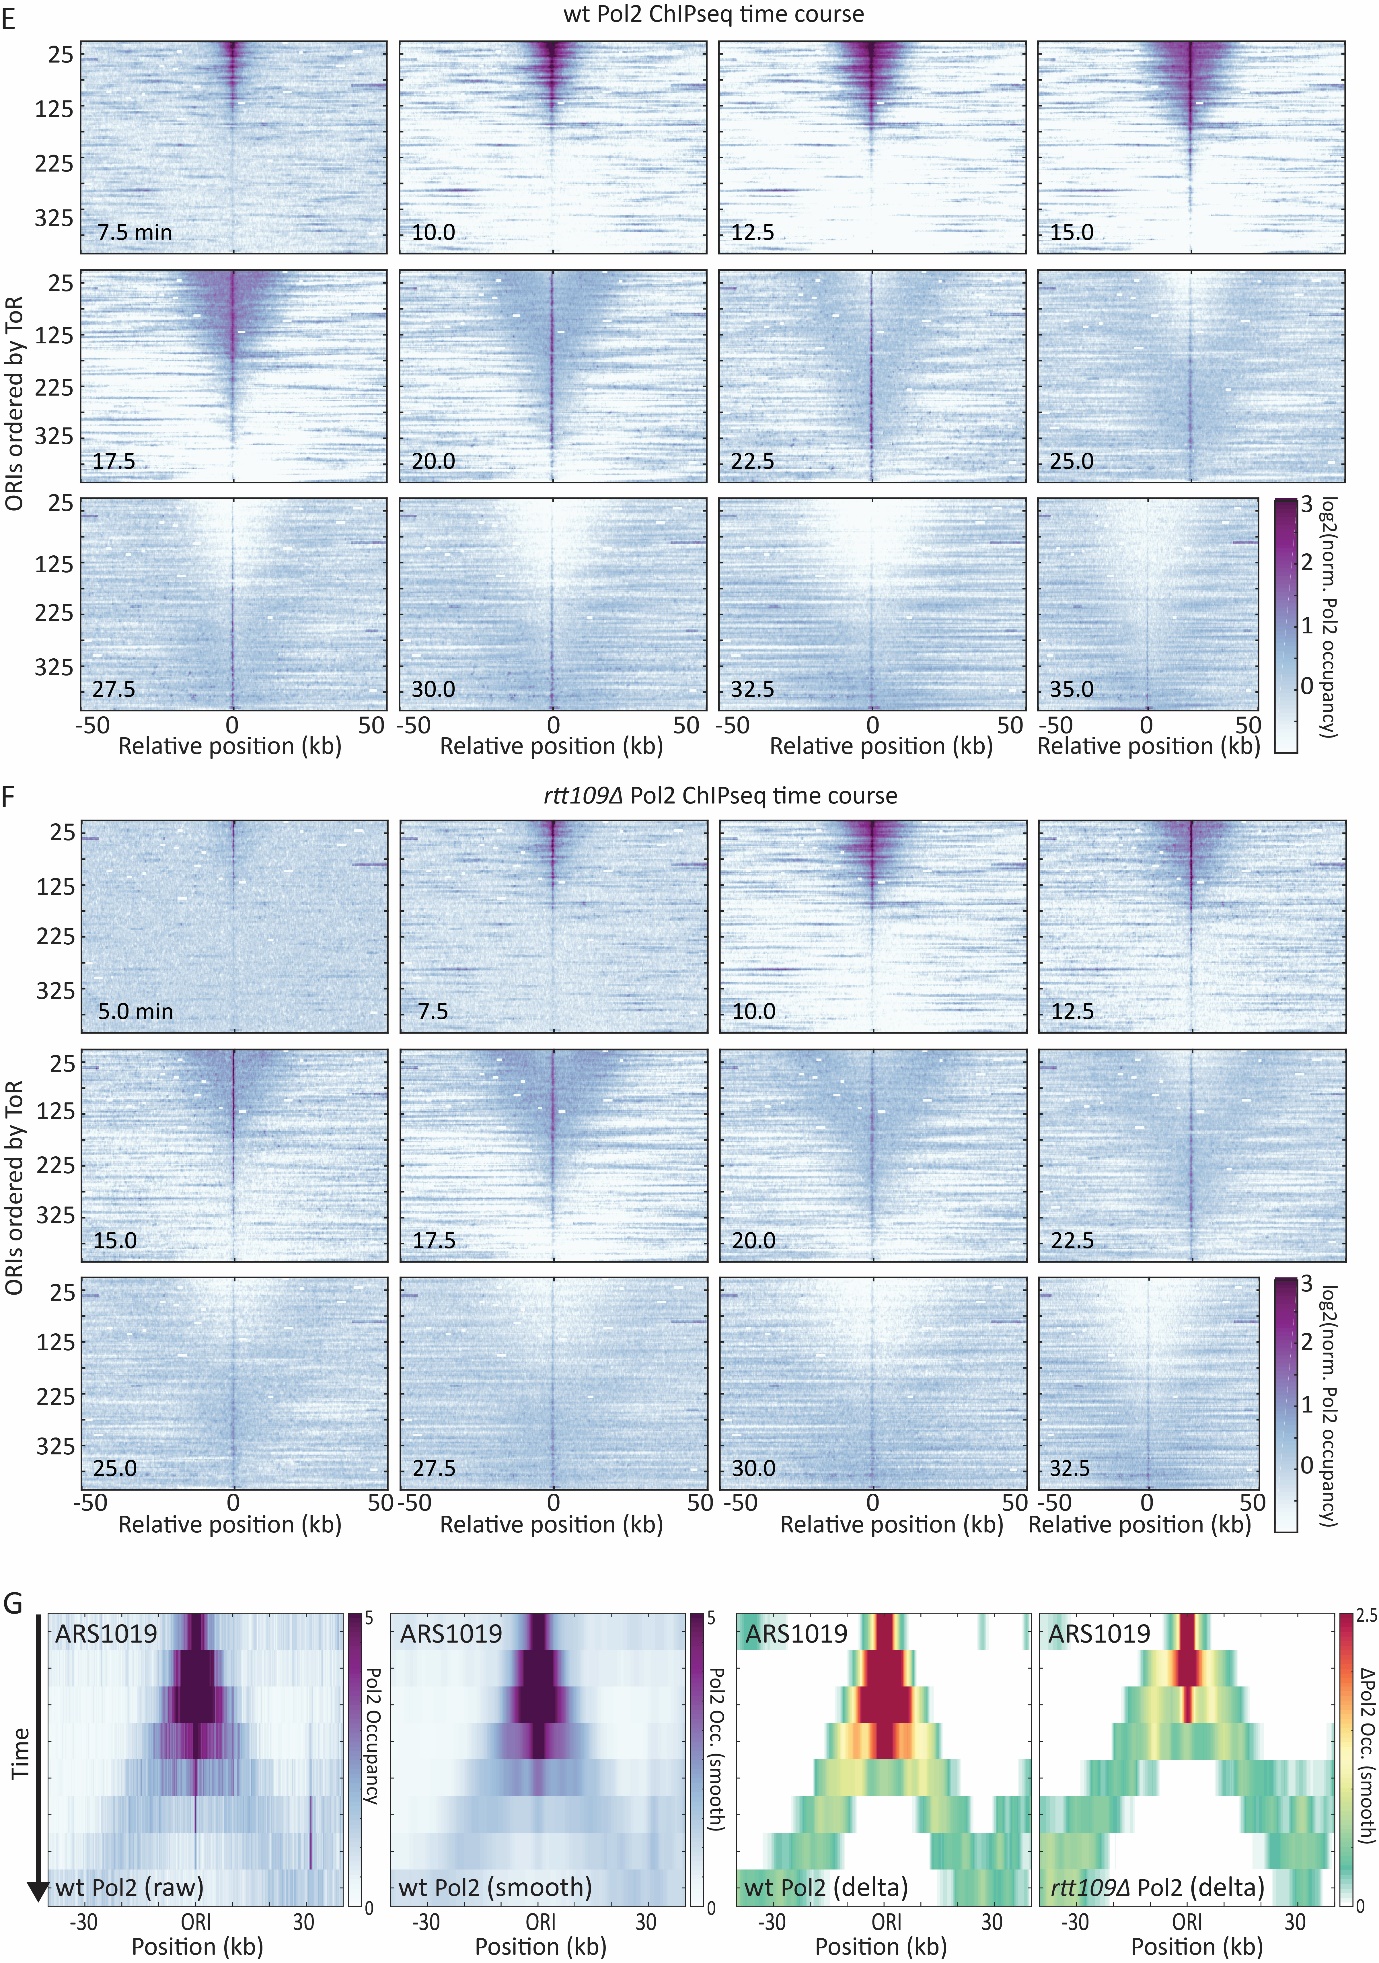


**Sup. Figure 1 – Analysis of dynamic DNA/ ChIP-seq profiles**

A) *Comparison between calculated time of replication (ToR) for wt (left) or rtt109Δ (right) cells and published wild type replication time* (RepTime, Yabuki et al. 2002) (Number indicates Pearson’s correlation between ToR and RepTime. *The ToR shift between wild-type and rtt109Δ cells is probably due to a difference in the release time from alpha factor but has no impact on the analysis.

B) *Origin firing in wt (grey) and rtt109Δ (blue) cells*. For each firing ORI (wt: 210 ORIs; rtt109Δ: 146 ORIs) the ToR (aligned to five earliest WT ORIs, according to Yabuki et al. (2002)) is plotted against its wild type replication time from Yabuki et al (2002) (RepTime; Line corresponds to the linear regression used to estimate initiation frequency).

C) *Hierarchy of ORI firing in wt and rtt109Δ cells*. Normalized Pol2 occupancy on all ORIs at the start of S-phase (7.5 min after release) of rtt109Δ cells is plotted against wild type cells (Color indicates RepTime, number indicates Pearson’s correlation between the occupancies in wt and *RTT109*-deleted cells).

D) *ORI firing dynamics in RTT109-deleted and wt cells*. Normalized Pol2 occupancy 1 kb (color coded) around the 410 ARS (from OriDB ) during the time course is shown (ORIs are ordered by RepTime).

E) *Full wt Pol2 ChIP time course*.

F) *Full rtt109Δ Pol2 ChIP time course*.

G) *Processing of Pol2 ChIP-seq data for manual analysis*. Left: Normalized Pol2 occupancy around an early ORI (ARS1019 of wt cells) at analyzed timepoints (7.5 to 25 min after release from top to bottom; color scale indicates Pol2 occupancy); mid-left: Pol2 occupancy around ORI after smoothing with Gaussian filter (Color indicates smoothened Pol2 occupancy); mid-right: Change in Pol2 during the time course - difference between Pol2 occupancy at a certain time and median Pol2 over the whole timecourse for each locus (Color indicates change in Pol2); right: same as mid-right for rtt109Δ cells (12.5 to 30 minutes).


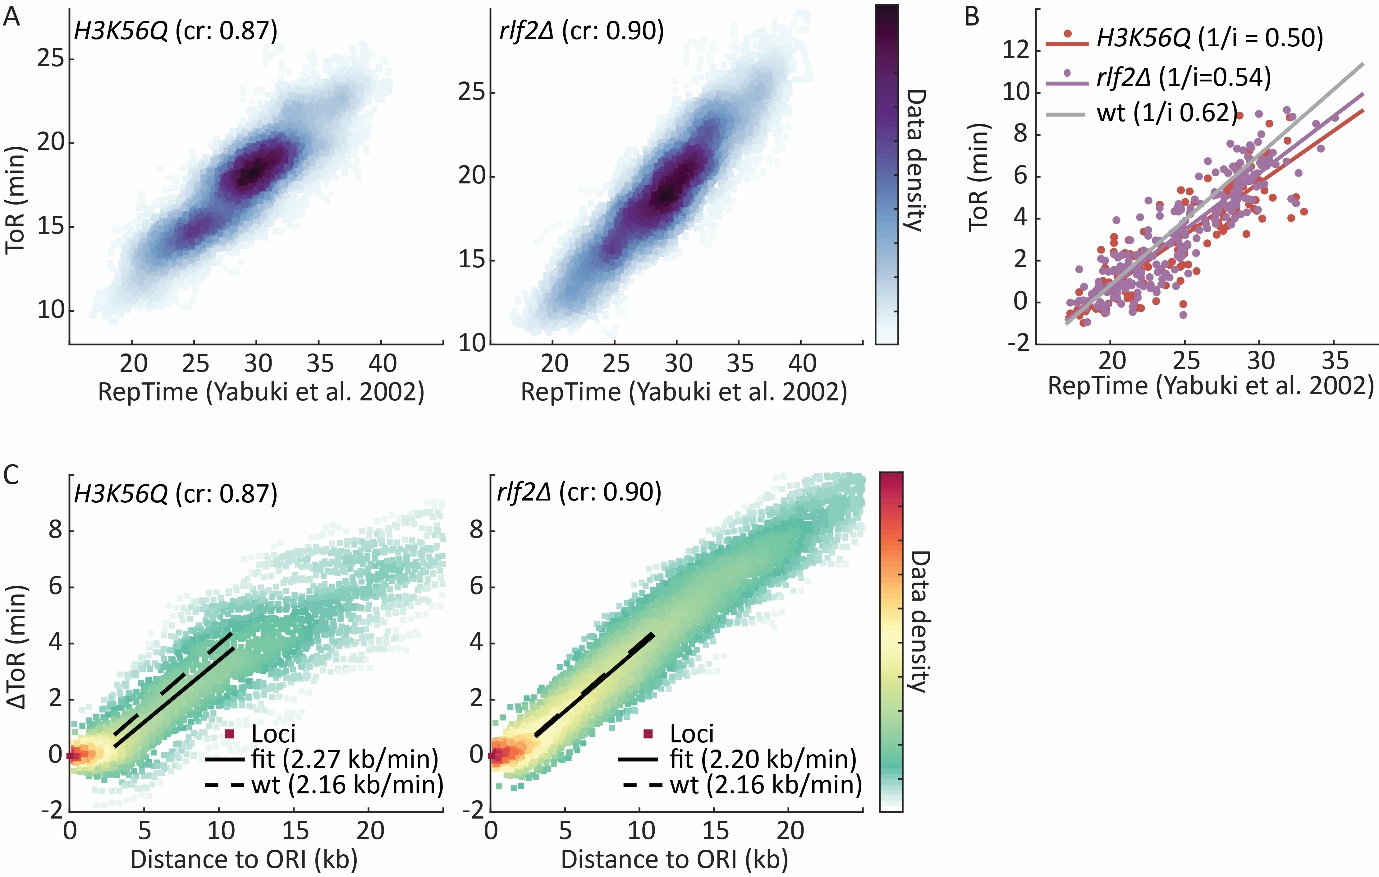


**Sup. Figure 2 – Analysis of dynamic DNA-seq profiles for H3K56Q and rlf2Δ**

A) *Comparison between the calculated time of replication (ToR) for H3K56Q or rlf2Δ and published replication time in wild type cells* (RepTime, Yabuki et al. 2002) (as Figure S1A).

B) *Calculating initiation frequency for H3K56Q and rlf2Δ* (as Figure S1B, grey line indicates wild type fit for comparison, ToR is adjusted to earliest firing ORIs according to Yabuki, 2002).

C) *Calculating fork velocity for H3K56Q and rlf2Δ* (as Figure 2C, dashed line indicates wt fit for comparison).


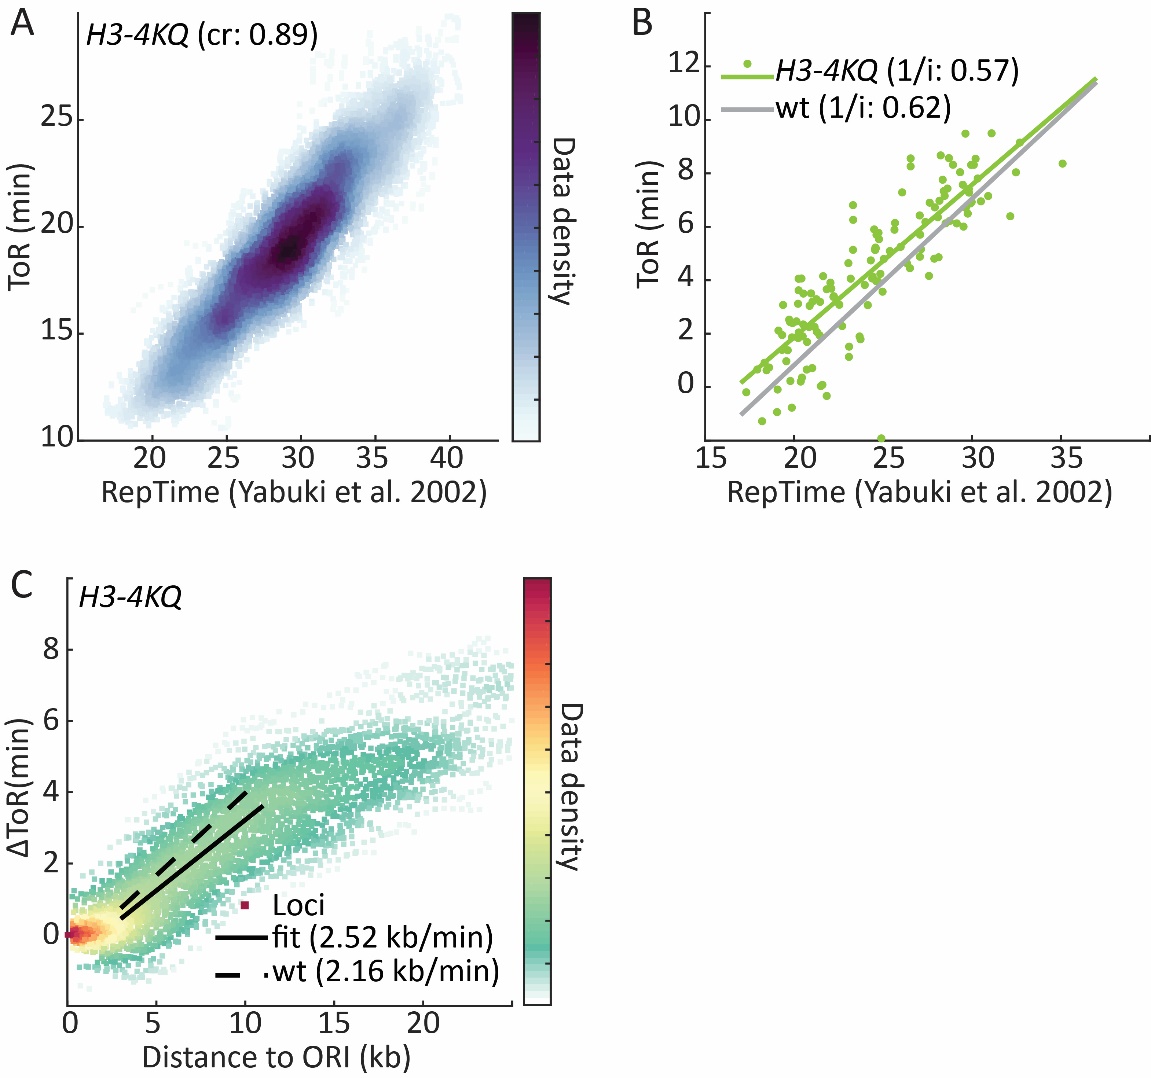


**Sup. Figure 3 – Analysis of dynamic DNA-seq profiles for H3-4KQ**

A) *Comparison between calculated time of replication (ToR) for H3-4KQ cells and published replication time in wild type ce*lls (RepTime, Yabuki et al. 2002) (as Figure S1A).

B) *Calculating initiation frequency for H3-4KQ* (as Figure S1B).

C) *Calculating fork velocity for H3-4KQ* (as Figure 2C).

| **Supplemental Table S1 - *S. cerevisiae* strains used in this study** | | | |
| --- | --- | --- | --- |
| **Number** | **Strain name** | **Genotype** | **Source** |
|  | BY4741 | MATa, his3-1, leu2-0, met15-0, ura3-0 |  |
| 1 | WT | BY4741 |  |
| 2 | WT *bar1Δ* | BY4741 *BAR1*:: *BAR1*Δ | This study |
| 3 | HA-Pol2 Myc-Mcm7 | BY4741 *MCM7*-9Myc-kanMX, *POL2*-6HA-nat *BAR1*:: *BAR1*Δ | This study |
| 4 | HA-Pol2 Myc-Mcm7 rtt109Δ | BY4741 *MCM7*-9Myc-kanMX, *POL2*-6HA-nat *RTT109*::KanMX *BAR1*:: *BAR1*Δ | This study |
| 5 | cac1Δ | BY4741 *CAC1*::KanMX | This study |
| 6 | rlf2Δ | BY4741 *RLF2*::KanMX | This study |
| 7 | K56Q | BY4741 *HHT1*[56Lys- > Gln],*HHT2*[56Lys- > Gln] | This study |
| 8 | K56Q bar1Δ | BY4741 *HHT1*[56Lys- > Gln],*HHT2*[56Lys- > Gln] *BAR1*:: *BAR1*Δ | This study |
| 9 | K56R | BY4741 *HHT1*[56Lys- > Arg],*HHT2*[56Lys- > Arg] | This study |
| 10 | K56A | BY4741 *HHT1*[56Lys- > Ala],*HHT2*[56Lys- > Ala] | This study |
| 11 | 4KQ | BY4741 *HHT1*[4Lys- > Gln,9Lys- > Gln,14Lys- > Gln,18Lys- > Gln],*HHT2*[9Lys- > Gln,14Lys- > Gln,18Lys- > Gln] | This study |
| 12 | 4KQ bar1Δ | BY4741 *HHT1*[4Lys- > Gln,9Lys- > Gln,14Lys- > Gln,18Lys- > Gln],*HHT2*[9Lys- > Gln,14Lys- > Gln,18Lys- > Gln] *BAR1*:: *BAR1*Δ | This study |
| 13 | rtt109Δ -K56R | BY4741 *HHT1*[56Lys- > Arg],*HHT2*[56Lys- > Arg] *RTT109*::KanMX | This study |
| 14 | Msi1Δ | BY4741 *MSI1*::KanMX | This study |
| 15 | rtt109Δ -K56Q | BY4741 *HHT1*[56Lys- > Gln],*HHT2*[56Lys- > Gln] *RTT109*::KanMX | This study |
| 16 | rtt109Δ -K56A | BY4741 *HHT1*[56Lys- > Ala],*HHT2*[56Lys- > Ala] *RTT109*::KanMX | This study |
| 17 | 4KA | BY4741 *HHT1*[4Lys- > Ala,9Lys- > Ala,14Lys- > Ala,18Lys- > Ala],*HHT2*[4Lys- > Ala,9Lys- > Ala,14Lys- > Ala,18Lys- > Ala] | This study |
| 18 | vps75Δ | BY4741 *VPS75*::KanMX | This study |
| 19 | rtt109Δ -4KA | BY4741 *HHT1*[4Lys- > Ala,9Lys- > Ala,14Lys- > Ala,18Lys- > Ala],*HHT2*[4Lys- > Ala,9Lys- > Ala,14Lys- > Ala,18Lys- > Ala] *RTT109*::KanMX | This study |
| 20 | asf1Δ | BY4741 *ASF1*::KanMX | Voichek et al., 2016 |
| 21 | 4KA-K56A | BY4741 *HHT1*[4Lys- > Ala,9Lys- > Ala,14Lys- > Ala,18Lys- > Ala,56Lys- > Ala],*HHT2*[4Lys- > Ala,9Lys- > Ala,14Lys- > Ala,18Lys- > Ala,56Lys- > Ala] | This study |
| 22 | 4KA-K56R | BY4741 *HHT1*[4Lys- > Ala,9Lys- > Ala,14Lys- > Ala,18Lys- > Ala,56Lys- > Arg],*HHT2*[4Lys- > Ala,9Lys- > Ala,14Lys- > Ala,18Lys- > Ala,56Lys- > Arg] | This study |
| 23 | rtt109Δ -K56R-4KA | BY4741 *HHT1*[4Lys- > Ala,9Lys- > Ala,14Lys- > Ala,18Lys- > Ala,56Lys- > Arg],*HHT2*[4Lys- > Ala,9Lys- > Ala,14Lys- > Ala,18Lys- > Ala,56Lys- > Arg] rtt109::KanMX | This study |
| 24 | rtt109Δ -K56A-4KA | BY4741 *HHT1*[4Lys- > Ala,9Lys- > Ala,14Lys- > Ala,18Lys- > Ala,56Lys- > Ala],*HHT2*[4Lys- > Ala,9Lys- > Ala,14Lys- > Ala,18Lys- > Ala,56Lys- > Ala] *RTT109*::KanMX | This study |
| 25 | 4KQ-K56R | BY4741 *HHT1*[4Lys- > Gln,9Lys- > Gln,14Lys- > Gln,18Lys- > Gln,56Lys- > Arg],*HHT2*[9Lys- > Gln,14Lys- > Gln,18Lys- > Gln,56Lys- > Arg] | This study |
| 26 | rtt109Δ -K56R-4KQ | BY4741 *HHT1*[4Lys- > Gln,9Lys- > Gln,14Lys- > Gln,18Lys- > Gln,56Lys- > Arg],*HHT2*[9Lys- > Gln,14Lys- > Gln,18Lys- > Gln,56Lys- > Arg] *RTT109*::KanMX | This study |
| 27 | rtt109Δ | BY4741 *RTT109*::KanMX | Voichek et al., 2016 |
| 28 | rtt109Δ bar1Δ | BY4741 *RTT109*::KanMX *BAR1*:: *BAR1*Δ | This study |
| 29 | rtt109Δ -4KQ | BY4741 *HHT1*[4Lys- > Gln,9Lys- > Gln,14Lys- > Gln,18Lys- > Gln],*HHT2*[9Lys- > Gln,14Lys- > Gln,18Lys- > Gln] *RTT109*::KanMX | This study |
| 30 | K56Q-4KQ | BY4741 *HHT1*[4Lys- > Gln,9Lys- > Gln,14Lys- > Gln,18Lys- > Gln,56Lys- >Gln],*HHT2*[9Lys- > Gln,14Lys- > Gln,18Lys- > Gln,56Lys- > Gln] | This study |
| 31 | rtt109Δ -K56Q-4KA | BY4741 *HHT1*[4Lys- > Ala,9Lys- > Ala,14Lys- > Ala,18Lys- > Ala,56Lys- > Gln],*HHT2*[4Lys- > Ala,9Lys- > Ala,14Lys- > Ala,18Lys- > Ala,56Lys- > Gln] *RTT109*::KanMX | This study |
| 32 | 4KR | BY4741 *HHT1*[4Lys- > Arg,9Lys- > Arg,14Lys- > Arg,18Lys- > Arg],*HHT2*[4Lys- > Arg,9Lys- > Arg,14Lys- > Arg,18Lys- > Arg] | This study |
| 33 | K56Q-4KA | BY4741 *HHT1*[4Lys- > Ala,9Lys- > Ala,14Lys- > Ala,18Lys- > Ala,56Lys- > Gln],*HHT2*[4Lys- > Ala,9Lys- > Ala,14Lys- > Ala,18Lys- > Ala,56Lys- > Gln] | This study |
| 34 | 4KQ-K56A | BY4741 *HHT1*[4Lys- > Gln,9Lys- > Gln,14Lys- > Gln,18Lys- > Gln,56Lys- >Ala],*HHT2*[9Lys- > Gln,14Lys- > Gln,18Lys- > Gln,56Lys- > Ala] | This study |
| 35 | K9Q | BY4741 *HHT1*[9Lys- > Gln,],*HHT2*[9Lys- > Gln] | This study |
| 36 | K9R | BY4741 *HHT1*[9Lys- > Arg,],*HHT2*[9Lys- > Arg] | This study |
| 37 | 5KQ | BY4741 *HHT1*[9Lys- > Gln,14Lys- > Gln,18Lys- > Gln,23Lys- > Gln,27Lys- > Gln],*HHT2*[9Lys- > Gln,14Lys- > Gln,18Lys- > Gln,23Lys- > Gln,27Lys- > Gln] | This study |
| 38 | 5KR | BY4741 *HHT1*[9Lys- > Arg,14Lys- > Arg,18Lys- > Arg,23Lys- > Arg,27Lys- > Arg],*HHT2*[9Lys- > Arg,14Lys- > Arg,18Lys- > Arg,23Lys- > Arg,27Lys- > Arg] | This study |
| 39 | rtt109Δ 4KR | BY4741 *HHT1*[4Lys- > Arg,9Lys- > Arg,14Lys- > Arg,18Lys- > Arg],*HHT2*[4Lys- > Arg,9Lys- > Arg,14Lys- > Arg,18Lys- > Arg] *RTT109*::KanMX | This study |
| 40 | HA-Pol2 Myc-Mcm7 K56Q bar1Δ | BY4741 *MCM7*-9Myc-kanMX, *POL2*-6HA-nat *HHT1*[56Lys- > Gln],*HHT2*[56Lys- > Gln] *BAR1*:: *BAR1*Δ | This study |
| 41 | HA-Pol2 Myc-Mcm7 4KR bar1Δ | BY4741 *MCM7*-9Myc-kanMX, *POL2*-6HA-nat *HHT1*[4Lys- > Arg,9Lys- > Arg,14Lys- > Arg,18Lys- > Arg],*HHT2*[4Lys- > Arg,9Lys- > Arg,14Lys- > Arg,18Lys- > Arg] *BAR1*:: *BAR1*Δ | This study |
| 42 | HA-Pol2 Myc-Mcm7 4KQ bar1Δ | BY4741 *MCM7*-9Myc-kanMX, *POL2*-6HA-nat *HHT1*[4Lys- > Gln,9Lys- > Gln,14Lys- > Gln,18Lys- > Gln],*HHT2*[9Lys- > Gln,14Lys- > Gln,18Lys- > Gln] *BAR1*:: *BAR1*Δ | This study |
| 43 | sgf29Δ | BY4741 *SGF29*::KanMX | This study |
| 44 | gcn5Δ | BY4741 *GCN5*::KanMX | This study |
| 45 | ada2Δ | BY4741 *ADA2*::KanMX | This study |
| 46 | ngg1Δ | BY4741 *NGG1*::KanMX | This study |
| 47 | sgf29Δ 4KQ | BY4741 *HHT1*[4Lys- > Gln,9Lys- > Gln,14Lys- > Gln,18Lys- > Gln],*HHT2*[9Lys- > Gln,14Lys- > Gln,18Lys- > Gln] *SGF29*::KanMX | This study |
| 48 | sgf29Δ 4KA | *HHT1*[4Lys- > Ala,9Lys- > Ala,14Lys- > Ala,18Lys- > Ala],*HHT2*[4Lys- > Ala,9Lys- > Ala,14Lys- > Ala,18Lys- > Ala] *SGF29*::KanMX | This study |
| 49 | gcn5Δ 4KQ | BY4741 *HHT1*[4Lys- > Gln,9Lys- > Gln,14Lys- > Gln,18Lys- > Gln],*HHT2*[9Lys- > Gln,14Lys- > Gln,18Lys- > Gln] *GCN5*::KanMX | This study |
| 50 | ada2Δ 4KQ | BY4741 *HHT1*[4Lys- > Gln,9Lys- > Gln,14Lys- > Gln,18Lys- > Gln],*HHT2*[9Lys- > Gln,14Lys- > Gln,18Lys- > Gln] *ADA2*::KanMX | This study |
| 51 | ada2Δ 4KA | BY4741 *HHT1*[4Lys- > Ala,9Lys- > Ala,14Lys- > Ala,18Lys- > Ala],*HHT2*[4Lys- > Ala,9Lys- > Ala,14Lys- > Ala,18Lys- > Ala] *ADA2*::KanMX | This study |
| 52 | ngg1Δ 4KQ | BY4741 *HHT1*[4Lys- > Gln,9Lys- > Gln,14Lys- > Gln,18Lys- > Gln],*HHT2*[9Lys- > Gln,14Lys- > Gln,18Lys- > Gln] *NGG1*::KanMX | This study |
| 53 | ngg1Δ 4KA | BY4741 *HHT1*[4Lys- > Ala,9Lys- > Ala,14Lys- > Ala,18Lys- > Ala],*HHT2*[4Lys- > Ala,9Lys- > Ala,14Lys- > Ala,18Lys- > Ala] *NGG1*::KanMX | This study |
| 54 | rtt109 K290Q | BY4741 *RTT109*[290Lys- > Gln] | This study |
| 55 | rtt109 DD287,288AA | BY4741 *RTT109*[287Asp- > Ala, 288Asp- > Ala] | This study |

**Supplemental Table S1** **– List of all strains used in the study**

| **Supplemental Table S2 - Plasmids used in the study** | | | |
| --- | --- | --- | --- |
| Number | Name | Description | Source |
| 1 | pMel13 | gRNA scaffold plasmid | Mans et al 2015 |
| 2 | p416 | Cas9 expression plasmid | DiCarlo et al. 2013 |
| 3 | bRA89 | Combined gRNA scaffold and Cas9 expression plasmid with Hygromycin resistance cassette | Anand et al. 2017 |
| 4 | pYM17 | HA-tagging plasmid with NatA resistance cassette | Janke et al. 2004 |
| 5 | pYM17+ | pYM17 with SpCYC1 terminator after HA-tag | This study |
| 6 | pYM18 | myc-tagging plasmid with G418 resistance cassette | Janke et al. 2004 |
| 7 | PYM18+ | pYM18 with SpCYC1 terminator after myc-tag | This study |

**Supplemental Table S2** **– List of all plasmids used in the study**
