# Supplementary material for: Rtt109 slows replication speed by histone N-terminal acetylation
Source: HighWire-hosted journal article supplement (doi:10.1101/gr.266510.120), 2021-02-09
Supplement: Supplemental_Table_S1.docx [file Supplemental_Table_S1.docx]

| **Supplemental Table S1 - *S. cerevisiae* strains used in this study** | | | |
| --- | --- | --- | --- |
| **Number** | **Strain name** | **Genotype** | **Source** |
|  | BY4741 | MATa, his3-1, leu2-0, met15-0, ura3-0 |  |
| 1 | WT | BY4741 |  |
| 2 | WT *bar1Δ* | BY4741 *BAR1*:: *BAR1*Δ | This study |
| 3 | HA-Pol2 Myc-Mcm7 | BY4741 *MCM7*-9Myc-kanMX, *POL2*-6HA-nat *BAR1*:: *BAR1*Δ | This study |
| 4 | HA-Pol2 Myc-Mcm7 rtt109Δ | BY4741 *MCM7*-9Myc-kanMX, *POL2*-6HA-nat *RTT109*::KanMX *BAR1*:: *BAR1*Δ | This study |
| 5 | cac1Δ | BY4741 *CAC1*::KanMX | This study |
| 6 | rlf2Δ | BY4741 *RLF2*::KanMX | This study |
| 7 | K56Q | BY4741 *HHT1*[56Lys- > Gln],*HHT2*[56Lys- > Gln] | This study |
| 8 | K56Q bar1Δ | BY4741 *HHT1*[56Lys- > Gln],*HHT2*[56Lys- > Gln] *BAR1*:: *BAR1*Δ | This study |
| 9 | K56R | BY4741 *HHT1*[56Lys- > Arg],*HHT2*[56Lys- > Arg] | This study |
| 10 | K56A | BY4741 *HHT1*[56Lys- > Ala],*HHT2*[56Lys- > Ala] | This study |
| 11 | 4KQ | BY4741 *HHT1*[4Lys- > Gln,9Lys- > Gln,14Lys- > Gln,18Lys- > Gln],*HHT2*[9Lys- > Gln,14Lys- > Gln,18Lys- > Gln] | This study |
| 12 | 4KQ bar1Δ | BY4741 *HHT1*[4Lys- > Gln,9Lys- > Gln,14Lys- > Gln,18Lys- > Gln],*HHT2*[9Lys- > Gln,14Lys- > Gln,18Lys- > Gln] *BAR1*:: *BAR1*Δ | This study |
| 13 | rtt109Δ -K56R | BY4741 *HHT1*[56Lys- > Arg],*HHT2*[56Lys- > Arg] *RTT109*::KanMX | This study |
| 14 | Msi1Δ | BY4741 *MSI1*::KanMX | This study |
| 15 | rtt109Δ -K56Q | BY4741 *HHT1*[56Lys- > Gln],*HHT2*[56Lys- > Gln] *RTT109*::KanMX | This study |
| 16 | rtt109Δ -K56A | BY4741 *HHT1*[56Lys- > Ala],*HHT2*[56Lys- > Ala] *RTT109*::KanMX | This study |
| 17 | 4KA | BY4741 *HHT1*[4Lys- > Ala,9Lys- > Ala,14Lys- > Ala,18Lys- > Ala],*HHT2*[4Lys- > Ala,9Lys- > Ala,14Lys- > Ala,18Lys- > Ala] | This study |
| 18 | vps75Δ | BY4741 *VPS75*::KanMX | This study |
| 19 | rtt109Δ -4KA | BY4741 *HHT1*[4Lys- > Ala,9Lys- > Ala,14Lys- > Ala,18Lys- > Ala],*HHT2*[4Lys- > Ala,9Lys- > Ala,14Lys- > Ala,18Lys- > Ala] *RTT109*::KanMX | This study |
| 20 | asf1Δ | BY4741 *ASF1*::KanMX | Voichek et al., 2016 |
| 21 | 4KA-K56A | BY4741 *HHT1*[4Lys- > Ala,9Lys- > Ala,14Lys- > Ala,18Lys- > Ala,56Lys- > Ala],*HHT2*[4Lys- > Ala,9Lys- > Ala,14Lys- > Ala,18Lys- > Ala,56Lys- > Ala] | This study |
| 22 | 4KA-K56R | BY4741 *HHT1*[4Lys- > Ala,9Lys- > Ala,14Lys- > Ala,18Lys- > Ala,56Lys- > Arg],*HHT2*[4Lys- > Ala,9Lys- > Ala,14Lys- > Ala,18Lys- > Ala,56Lys- > Arg] | This study |
| 23 | rtt109Δ -K56R-4KA | BY4741 *HHT1*[4Lys- > Ala,9Lys- > Ala,14Lys- > Ala,18Lys- > Ala,56Lys- > Arg],*HHT2*[4Lys- > Ala,9Lys- > Ala,14Lys- > Ala,18Lys- > Ala,56Lys- > Arg] rtt109::KanMX | This study |
| 24 | rtt109Δ -K56A-4KA | BY4741 *HHT1*[4Lys- > Ala,9Lys- > Ala,14Lys- > Ala,18Lys- > Ala,56Lys- > Ala],*HHT2*[4Lys- > Ala,9Lys- > Ala,14Lys- > Ala,18Lys- > Ala,56Lys- > Ala] *RTT109*::KanMX | This study |
| 25 | 4KQ-K56R | BY4741 *HHT1*[4Lys- > Gln,9Lys- > Gln,14Lys- > Gln,18Lys- > Gln,56Lys- > Arg],*HHT2*[9Lys- > Gln,14Lys- > Gln,18Lys- > Gln,56Lys- > Arg] | This study |
| 26 | rtt109Δ -K56R-4KQ | BY4741 *HHT1*[4Lys- > Gln,9Lys- > Gln,14Lys- > Gln,18Lys- > Gln,56Lys- > Arg],*HHT2*[9Lys- > Gln,14Lys- > Gln,18Lys- > Gln,56Lys- > Arg] *RTT109*::KanMX | This study |
| 27 | rtt109Δ | BY4741 *RTT109*::KanMX | Voichek et al., 2016 |
| 28 | rtt109Δ bar1Δ | BY4741 *RTT109*::KanMX *BAR1*:: *BAR1*Δ | This study |
| 29 | rtt109Δ -4KQ | BY4741 *HHT1*[4Lys- > Gln,9Lys- > Gln,14Lys- > Gln,18Lys- > Gln],*HHT2*[9Lys- > Gln,14Lys- > Gln,18Lys- > Gln] *RTT109*::KanMX | This study |
| 30 | K56Q-4KQ | BY4741 *HHT1*[4Lys- > Gln,9Lys- > Gln,14Lys- > Gln,18Lys- > Gln,56Lys- >Gln],*HHT2*[9Lys- > Gln,14Lys- > Gln,18Lys- > Gln,56Lys- > Gln] | This study |
| 31 | rtt109Δ -K56Q-4KA | BY4741 *HHT1*[4Lys- > Ala,9Lys- > Ala,14Lys- > Ala,18Lys- > Ala,56Lys- > Gln],*HHT2*[4Lys- > Ala,9Lys- > Ala,14Lys- > Ala,18Lys- > Ala,56Lys- > Gln] *RTT109*::KanMX | This study |
| 32 | 4KR | BY4741 *HHT1*[4Lys- > Arg,9Lys- > Arg,14Lys- > Arg,18Lys- > Arg],*HHT2*[4Lys- > Arg,9Lys- > Arg,14Lys- > Arg,18Lys- > Arg] | This study |
| 33 | K56Q-4KA | BY4741 *HHT1*[4Lys- > Ala,9Lys- > Ala,14Lys- > Ala,18Lys- > Ala,56Lys- > Gln],*HHT2*[4Lys- > Ala,9Lys- > Ala,14Lys- > Ala,18Lys- > Ala,56Lys- > Gln] | This study |
| 34 | 4KQ-K56A | BY4741 *HHT1*[4Lys- > Gln,9Lys- > Gln,14Lys- > Gln,18Lys- > Gln,56Lys- >Ala],*HHT2*[9Lys- > Gln,14Lys- > Gln,18Lys- > Gln,56Lys- > Ala] | This study |
| 35 | K9Q | BY4741 *HHT1*[9Lys- > Gln,],*HHT2*[9Lys- > Gln] | This study |
| 36 | K9R | BY4741 *HHT1*[9Lys- > Arg,],*HHT2*[9Lys- > Arg] | This study |
| 37 | 5KQ | BY4741 *HHT1*[9Lys- > Gln,14Lys- > Gln,18Lys- > Gln,23Lys- > Gln,27Lys- > Gln],*HHT2*[9Lys- > Gln,14Lys- > Gln,18Lys- > Gln,23Lys- > Gln,27Lys- > Gln] | This study |
| 38 | 5KR | BY4741 *HHT1*[9Lys- > Arg,14Lys- > Arg,18Lys- > Arg,23Lys- > Arg,27Lys- > Arg],*HHT2*[9Lys- > Arg,14Lys- > Arg,18Lys- > Arg,23Lys- > Arg,27Lys- > Arg] | This study |
| 39 | rtt109Δ 4KR | BY4741 *HHT1*[4Lys- > Arg,9Lys- > Arg,14Lys- > Arg,18Lys- > Arg],*HHT2*[4Lys- > Arg,9Lys- > Arg,14Lys- > Arg,18Lys- > Arg] *RTT109*::KanMX | This study |
| 40 | HA-Pol2 Myc-Mcm7 K56Q bar1Δ | BY4741 *MCM7*-9Myc-kanMX, *POL2*-6HA-nat *HHT1*[56Lys- > Gln],*HHT2*[56Lys- > Gln] *BAR1*:: *BAR1*Δ | This study |
| 41 | HA-Pol2 Myc-Mcm7 4KR bar1Δ | BY4741 *MCM7*-9Myc-kanMX, *POL2*-6HA-nat *HHT1*[4Lys- > Arg,9Lys- > Arg,14Lys- > Arg,18Lys- > Arg],*HHT2*[4Lys- > Arg,9Lys- > Arg,14Lys- > Arg,18Lys- > Arg] *BAR1*:: *BAR1*Δ | This study |
| 42 | HA-Pol2 Myc-Mcm7 4KQ bar1Δ | BY4741 *MCM7*-9Myc-kanMX, *POL2*-6HA-nat *HHT1*[4Lys- > Gln,9Lys- > Gln,14Lys- > Gln,18Lys- > Gln],*HHT2*[9Lys- > Gln,14Lys- > Gln,18Lys- > Gln] *BAR1*:: *BAR1*Δ | This study |
| 43 | sgf29Δ | BY4741 *SGF29*::KanMX | This study |
| 44 | gcn5Δ | BY4741 *GCN5*::KanMX | This study |
| 45 | ada2Δ | BY4741 *ADA2*::KanMX | This study |
| 46 | ngg1Δ | BY4741 *NGG1*::KanMX | This study |
| 47 | sgf29Δ 4KQ | BY4741 *HHT1*[4Lys- > Gln,9Lys- > Gln,14Lys- > Gln,18Lys- > Gln],*HHT2*[9Lys- > Gln,14Lys- > Gln,18Lys- > Gln] *SGF29*::KanMX | This study |
| 48 | sgf29Δ 4KA | *HHT1*[4Lys- > Ala,9Lys- > Ala,14Lys- > Ala,18Lys- > Ala],*HHT2*[4Lys- > Ala,9Lys- > Ala,14Lys- > Ala,18Lys- > Ala] *SGF29*::KanMX | This study |
| 49 | gcn5Δ 4KQ | BY4741 *HHT1*[4Lys- > Gln,9Lys- > Gln,14Lys- > Gln,18Lys- > Gln],*HHT2*[9Lys- > Gln,14Lys- > Gln,18Lys- > Gln] *GCN5*::KanMX | This study |
| 50 | ada2Δ 4KQ | BY4741 *HHT1*[4Lys- > Gln,9Lys- > Gln,14Lys- > Gln,18Lys- > Gln],*HHT2*[9Lys- > Gln,14Lys- > Gln,18Lys- > Gln] *ADA2*::KanMX | This study |
| 51 | ada2Δ 4KA | BY4741 *HHT1*[4Lys- > Ala,9Lys- > Ala,14Lys- > Ala,18Lys- > Ala],*HHT2*[4Lys- > Ala,9Lys- > Ala,14Lys- > Ala,18Lys- > Ala] *ADA2*::KanMX | This study |
| 52 | ngg1Δ 4KQ | BY4741 *HHT1*[4Lys- > Gln,9Lys- > Gln,14Lys- > Gln,18Lys- > Gln],*HHT2*[9Lys- > Gln,14Lys- > Gln,18Lys- > Gln] *NGG1*::KanMX | This study |
| 53 | ngg1Δ 4KA | BY4741 *HHT1*[4Lys- > Ala,9Lys- > Ala,14Lys- > Ala,18Lys- > Ala],*HHT2*[4Lys- > Ala,9Lys- > Ala,14Lys- > Ala,18Lys- > Ala] *NGG1*::KanMX | This study |
| 54 | rtt109 K290Q | BY4741 *RTT109*[290Lys- > Gln] | This study |
| 55 | rtt109 DD287,288AA | BY4741 *RTT109*[287Asp- > Ala, 288Asp- > Ala] | This study |

**Supplemental Table S1** **– List of all strains used in the study**
