# Supplementary material for: Rtt109 slows replication speed by histone N-terminal acetylation
Source: HighWire-hosted journal article supplement (doi:10.1101/gr.266510.120), 2021-02-09
Supplement: Supplemental_Table_S2.docx [file Supplemental_Table_S2.docx]

| **Supplemental Table S2 - Plasmids used in the study** | | | |
| --- | --- | --- | --- |
| Number | Name | Description | Source |
| 1 | pMel13 | gRNA scaffold plasmid | Mans et al 2015 |
| 2 | p416 | Cas9 expression plasmid | DiCarlo et al. 2013 |
| 3 | bRA89 | Combined gRNA scaffold and Cas9 expression plasmid with Hygromycin resistance cassette | Anand et al. 2017 |
| 4 | pYM17 | HA-tagging plasmid with NatA resistance cassette | Janke et al. 2004 |
| 5 | pYM17+ | pYM17 with SpCYC1 terminator after HA-tag | This study |
| 6 | pYM18 | myc-tagging plasmid with G418 resistance cassette | Janke et al. 2004 |
| 7 | PYM18+ | pYM18 with SpCYC1 terminator after myc-tag | This study |

**Supplemental Table S2** **– List of all plasmids used in the study**
