# Supplementary figures and images for: Rtt109 slows replication speed by histone N-terminal acetylation
Source: PubMed Central journal article supplement — Genome Res. 2021 Mar;31(3):426–35. doi: 10.1101/gr.266510.120 (PMC7919450; doi:10.1101/gr.266510.120), 2021-03

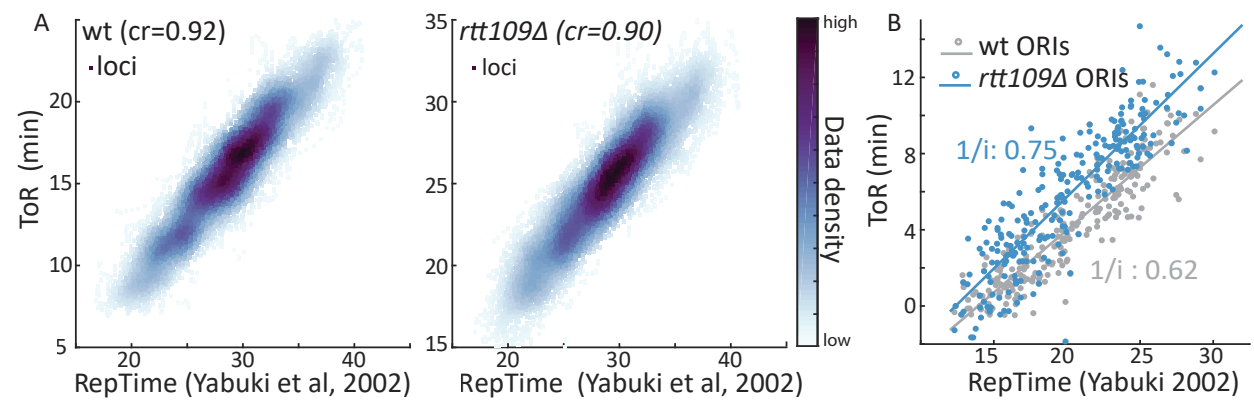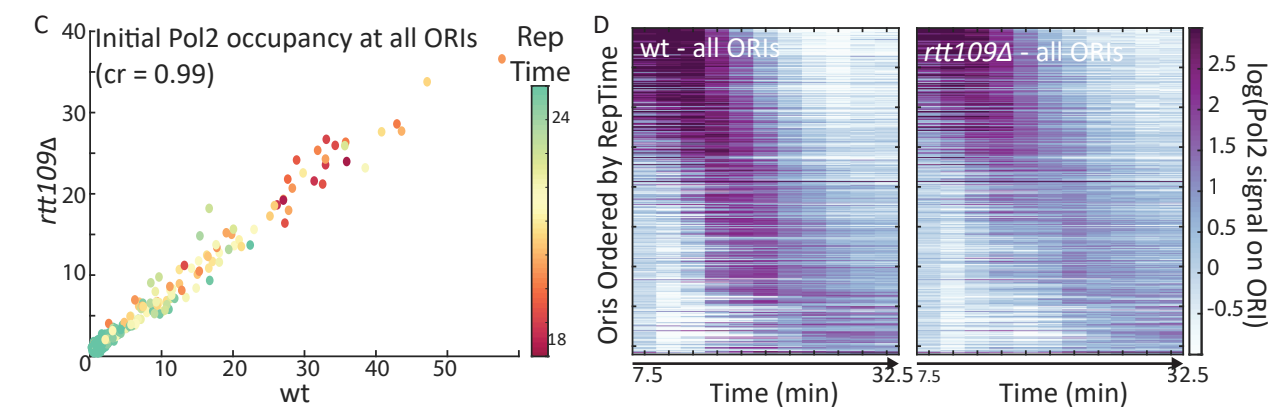

Supplement: supp_gr.266510.120_Supplemental_Fig_S1A.pdf [file supp_gr.266510.120_Supplemental_Fig_S1A.pdf]

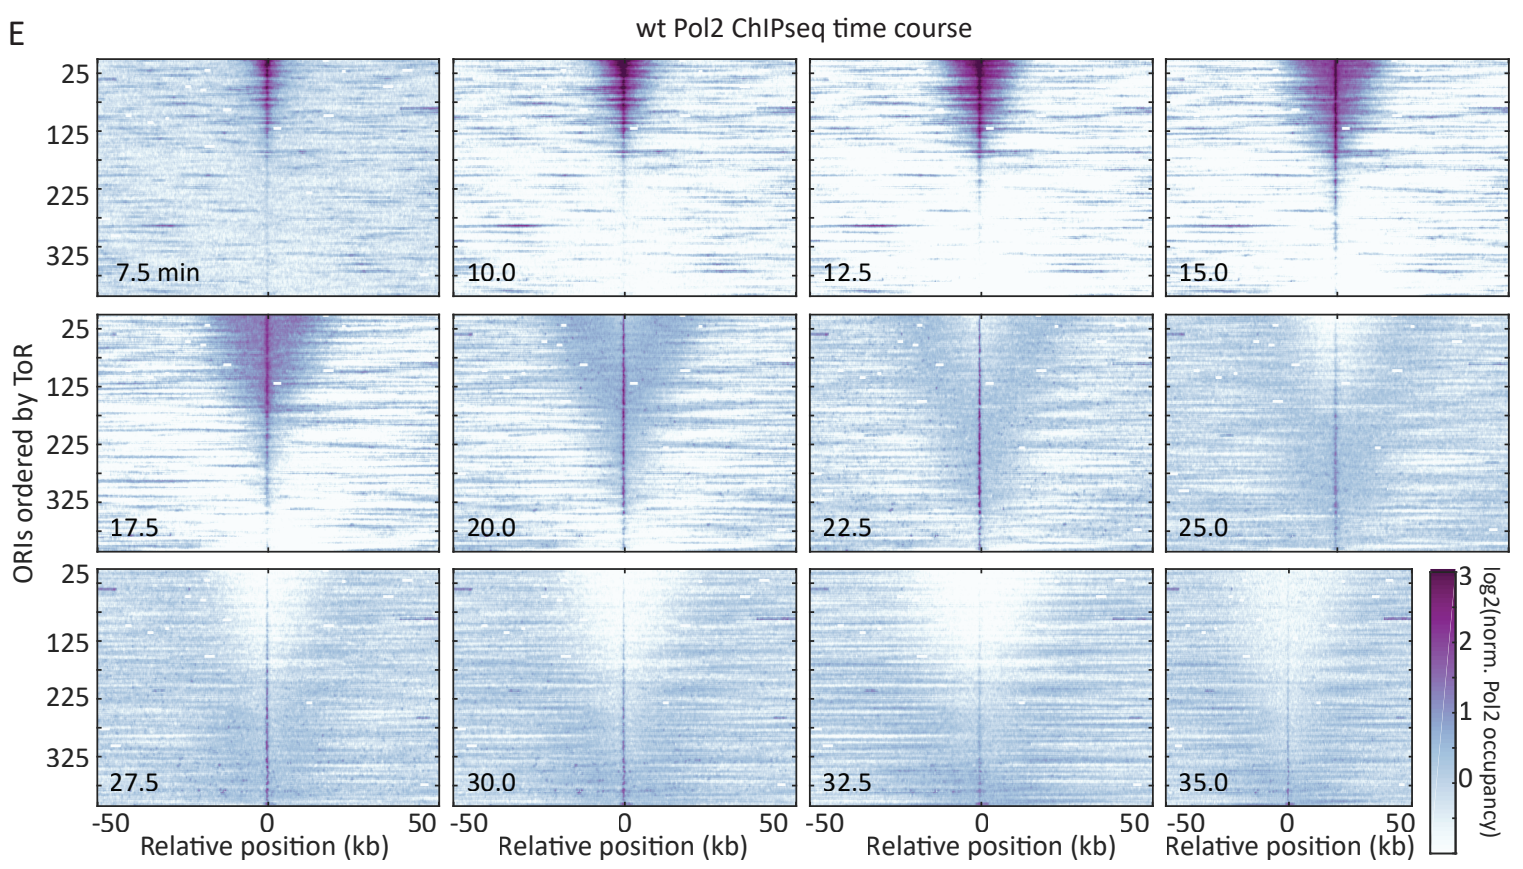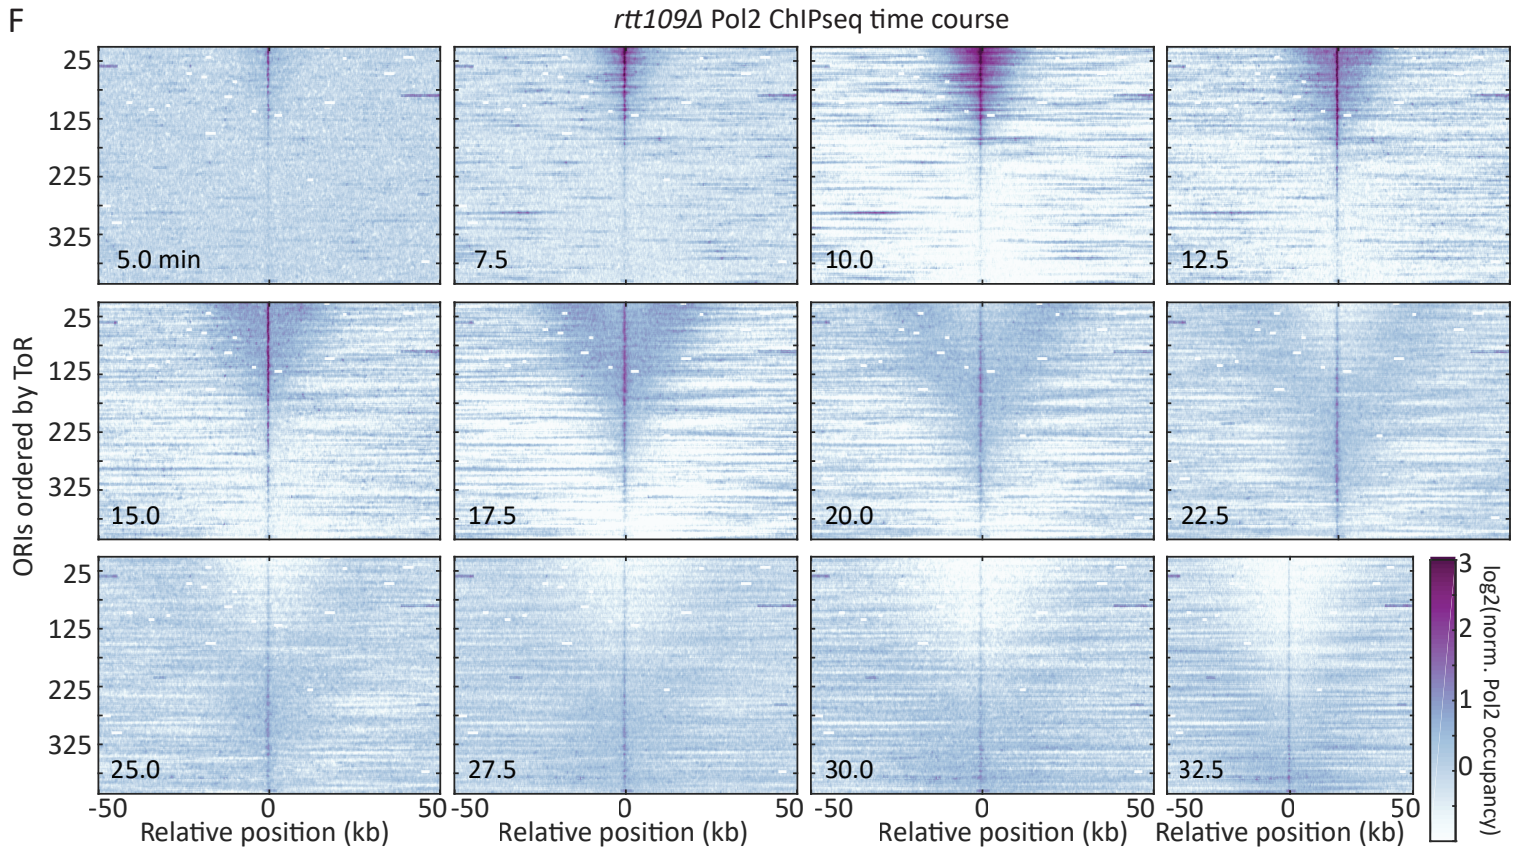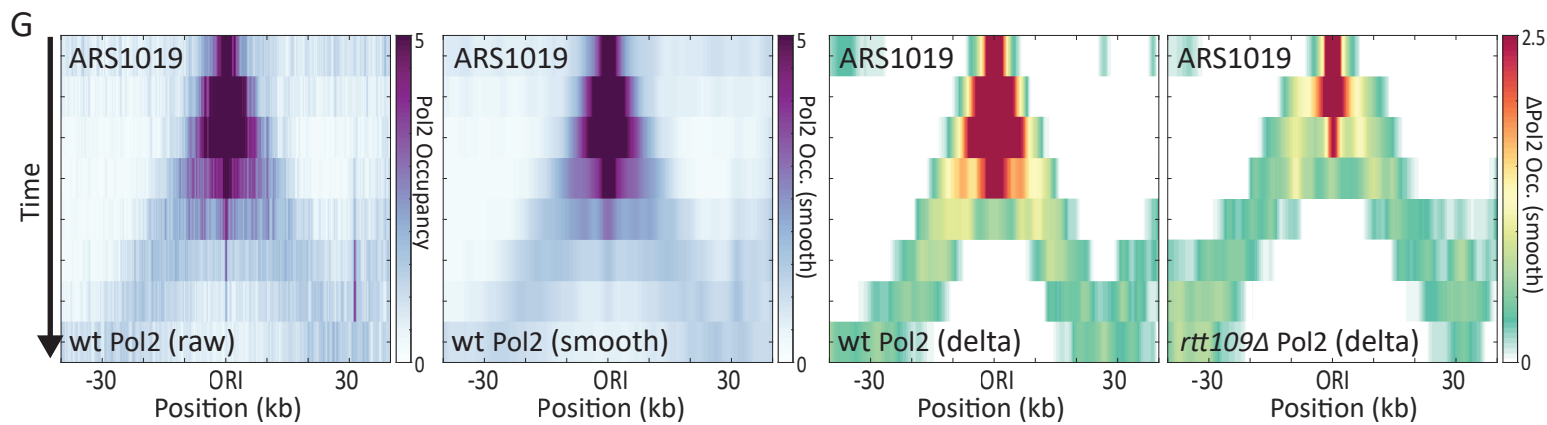

Supplement: supp_gr.266510.120_Supplemental_Fig_S1B.pdf [file supp_gr.266510.120_Supplemental_Fig_S1B.pdf]

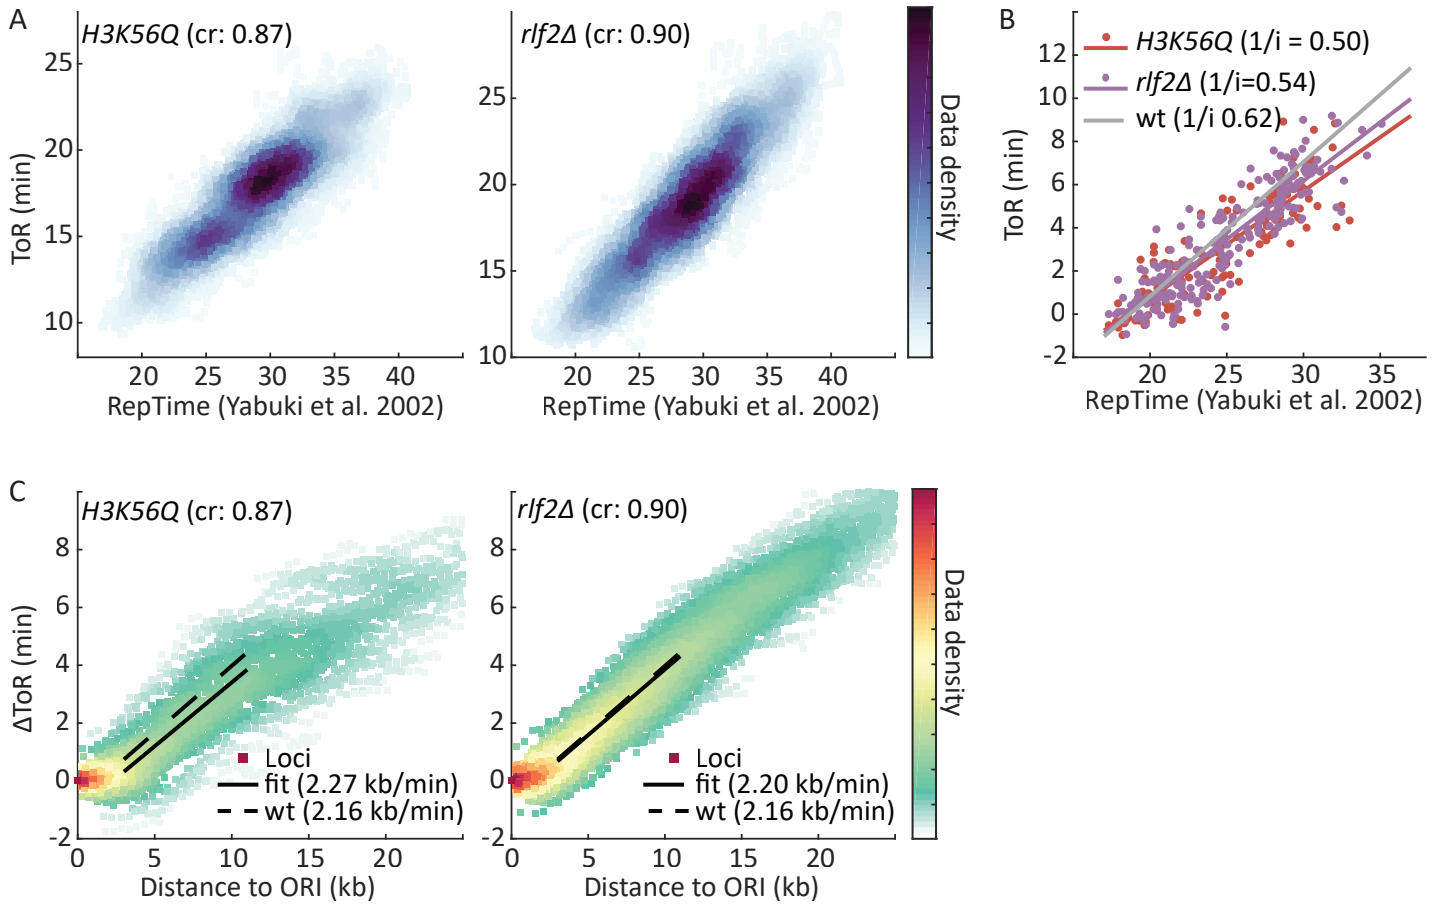

Supplement: supp_gr.266510.120_Supplemental_Fig_S2.pdf [file supp_gr.266510.120_Supplemental_Fig_S2.pdf]

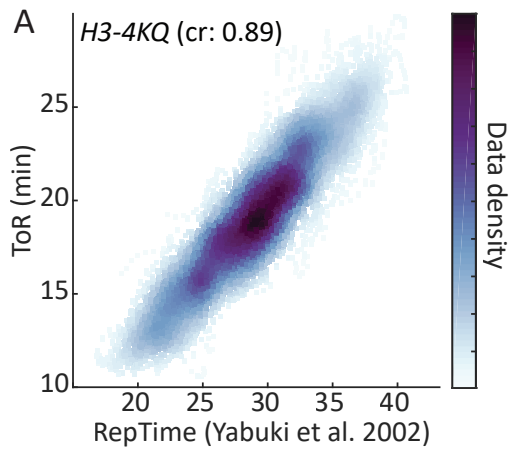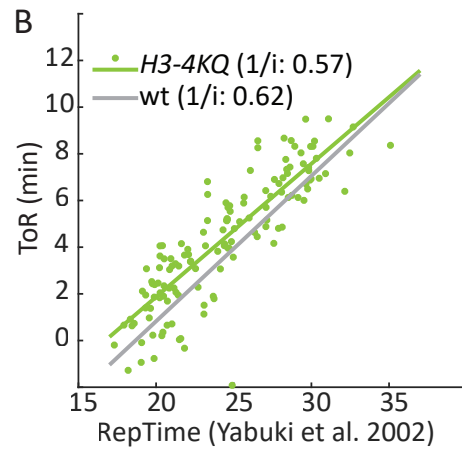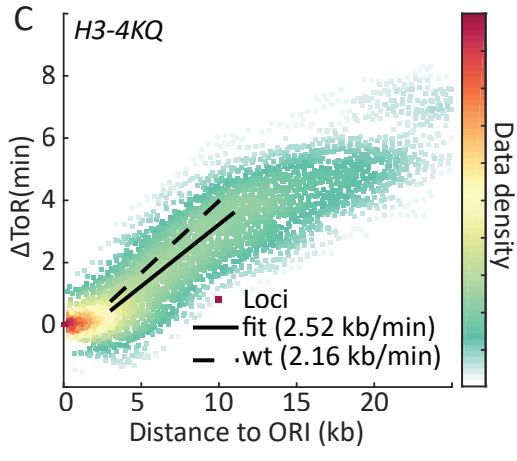

Supplement: supp_gr.266510.120_Supplemental_Fig_S3.pdf [file supp_gr.266510.120_Supplemental_Fig_S3.pdf]
